# Supplementary material
Source: Springer Nature journal article supplement (https://www.springermedizin.de/resource/supplementary/12889_2005_386_MOESM8_ESM.pdf/9501476)
Supplement: MOESM8 [file 9501476]

## Formal Research Support for Information

MINIMUM

MAXIMUM

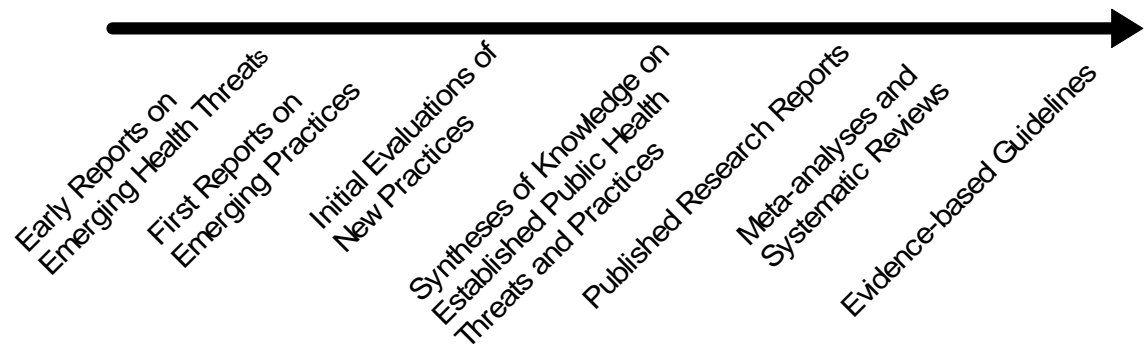

\* Minimum research support: Descriptive data with limited interpretation

\*\* Maximum research support: Synthesized, interpreted findings from multiple high quality studies
